# Supplementary material for: Growing Global Research Interest in Antimicrobial Peptides for Caries Management: A Bibliometric Analysis
Source: MDPI journal article supplement (doi:10.3390/jfb13040210), 2022-10-29
Supplement: s1 [file s1]

# Growing Global Research Interest in Antimicrobial Peptides for Caries Management: A Bibliometric Analysis

Olivia Lili Zhang <sup>1</sup>, John Yun Niu <sup>1</sup>, Iris Xiaoxue Yin <sup>1</sup>, Ollie Yiru Yu <sup>1</sup>, May Lei Mei <sup>2</sup> and Chun Hung Chu <sup>1,\*</sup>

<sup>1</sup> Faculty of Dentistry, The University of Hong Kong, Hong Kong, China

<sup>2</sup> Faculty of Dentistry, The University of Otago, Dunedin 9054, New Zealand

\* Correspondence: chchu@hku.hk

**Table S1.** Information of the included publications

| Title                                                                                                                                                       | Source                                                                          | Publication Year | Total Citation | Citation Density |
|-------------------------------------------------------------------------------------------------------------------------------------------------------------|---------------------------------------------------------------------------------|------------------|----------------|------------------|
| Antimicrobial peptides for the prevention and treatment of dental caries: A concise review                                                                  | Archives of Oral Biology                                                        | 2021             | 21             | 21.00            |
| Application of Antibiotics/Antimicrobial Agents on Dental Caries                                                                                            | Biomed Research International                                                   | 2020             | 27             | 13.50            |
| Potential applications of antimicrobial peptides and their mimics in combating caries and pulpal infections                                                 | Acta Biomaterialia                                                              | 2017             | 67             | 13.40            |
| Use of Antimicrobial Peptides Against Microbial Biofilms: Advantages and Limits                                                                             | Current Medicinal Chemistry                                                     | 2011             | 137            | 12.45            |
| Antimicrobial Peptide-Polymer Conjugates for Dentistry                                                                                                      | Acs Applied Polymer Materials                                                   | 2020             | 24             | 12.00            |
| Precision-guided antimicrobial peptide as a targeted modulator of human microbial ecology                                                                   | Proceedings of the National Academy of Sciences of the United States of America | 2015             | 81             | 11.57            |
| Human beta-defensins 2 and 3 demonstrate strain-selective activity against oral microorganisms                                                              | Journal of Clinical Microbiology                                                | 2004             | 205            | 11.39            |
| Susceptibilities of periodontopathogenic and cariogenic bacteria to antibacterial peptides, $\beta$ -defensins and LL37, produced by human epithelial cells | Journal of Antimicrobial Chemotherapy                                           | 2005             | 177            | 10.41            |
| Effect of MUC7 peptides on the growth of bacteria and on Streptococcus mutans biofilm                                                                       | Journal of Antimicrobial Chemotherapy                                           | 2006             | 163            | 10.19            |

|                                                                                                                                  |                                       |      |     |       |
|----------------------------------------------------------------------------------------------------------------------------------|---------------------------------------|------|-----|-------|
| Inhibitory effect of LL-37 and human lactoferricin on growth and biofilm formation of anaerobes associated with oral diseases    | Anaerobe                              | 2021 | 10  | 10.00 |
| Targeted killing of Streptococcus mutans by a pheromone-guided "smart" antimicrobial peptide                                     | Antimicrobial Agents and Chemotherapy | 2006 | 158 | 9.88  |
| Antimicrobial peptide GH12 suppresses cariogenic virulence factors of Streptococcus mutans                                       | Journal of Oral Microbiology          | 2018 | 34  | 8.50  |
| Antimicrobial peptide-loaded liquid crystalline precursor bioadhesive system for the prevention of dental caries                 | International Journal of Nanomedicine | 2018 | 33  | 8.25  |
| Treatment of Oral Multispecies Biofilms by an Anti-Biofilm Peptide                                                               | Plos One                              | 2015 | 57  | 8.14  |
| Activity of an antimicrobial peptide mimetic against planktonic and biofilm cultures of oral pathogens                           | Antimicrobial Agents and Chemotherapy | 2007 | 113 | 7.53  |
| Salivary antimicrobial peptide expression and dental caries experience in children                                               | Antimicrobial Agents and Chemotherapy | 2005 | 128 | 7.53  |
| Constructing an Antibiofouling and Mineralizing Bioactive Tooth Surface to Protect against Decay and Promote Self-Healing        | Acs Applied Materials & Interfaces    | 2020 | 15  | 7.50  |
| De novo synthetic short antimicrobial peptides against cariogenic bacteria                                                       | Archives of Oral Biology              | 2017 | 37  | 7.40  |
| Gene-environment Interactions in the Etiology of Dental Caries                                                                   | Journal of Dental Research            | 2016 | 44  | 7.33  |
| Antibacterial peptide nisin: A potential role in the inhibition of oral pathogenic bacteria                                      | Peptides                              | 2014 | 57  | 7.13  |
| Antimicrobial and anti-biofilm effect of Bac8c on major bacteria associated with dental caries and Streptococcus mutans biofilms | Peptides                              | 2014 | 55  | 6.88  |
| Antimicrobial peptide control of pathogenic microorganisms of the oral cavity: A review of the literature                        | Peptides                              | 2012 | 68  | 6.80  |

|                                                                                                                                                               |                                                    |      |    |      |
|---------------------------------------------------------------------------------------------------------------------------------------------------------------|----------------------------------------------------|------|----|------|
| Antibiofilm peptides against biofilms on titanium and hydroxyapatite surfaces                                                                                 | Bioactive Materials                                | 2018 | 26 | 6.50 |
| Effect of a novel antimicrobial peptide chrysopsin-1 on oral pathogens and Streptococcus mutans biofilms                                                      | Peptides                                           | 2012 | 62 | 6.20 |
| Effects of antimicrobial peptide L-K6, a temporin-1CEb analog on oral pathogen growth, Streptococcus mutans biofilm formation, and anti-inflammatory activity | Applied Microbiology and Biotechnology             | 2014 | 49 | 6.13 |
| A tooth-binding antimicrobial peptide to prevent the formation of dental biofilm                                                                              | Journal of Materials Science-Materials in Medicine | 2019 | 18 | 6.00 |
| Cationic Antimicrobial Peptides Are Leading the Way to Combat Oropathogenic Infections                                                                        | Acs Infectious Diseases                            | 2021 | 6  | 6.00 |
| A Novel Strategy for Caries Management: Constructing an Antibiofouling and Mineralizing Dual-Bioactive Tooth Surface                                          | Acs Applied Materials & Interfaces                 | 2021 | 6  | 6.00 |
| Antibacterial effect and bond strength of a modified dental adhesive containing the peptide nisin                                                             | Peptides                                           | 2018 | 22 | 5.50 |
| The Antimicrobial Peptide DEFB1 Is Associated with Caries                                                                                                     | Journal of Dental Research                         | 2010 | 65 | 5.42 |
| Nisin inhibits dental caries-associated microorganism in vitro                                                                                                | Peptides                                           | 2010 | 65 | 5.42 |
| Design and antimicrobial activities of LL-37 derivatives inhibiting the formation of Streptococcus mutans biofilm                                             | Chemical Biology & Drug Design                     | 2019 | 16 | 5.33 |
| In vitro assessment of antimicrobial peptides as potential agents against several oral bacteria                                                               | Journal of Antimicrobial Chemotherapy              | 2006 | 85 | 5.31 |
| Selective Membrane Disruption: Mode of Action of C16G2, a Specifically Targeted Antimicrobial Peptide                                                         | Antimicrobial Agents and Chemotherapy              | 2011 | 56 | 5.09 |
| Promotion of enamel caries remineralization by an amelogenin-derived peptide in a rat model                                                                   | Archives of Oral Biology                           | 2017 | 25 | 5.00 |
| Antimicrobial peptide GH12 targets Streptococcus mutans to arrest caries development in rats                                                                  | Journal of Oral Microbiology                       | 2019 | 15 | 5.00 |

|                                                                                                                                                        |                                       |      |    |      |
|--------------------------------------------------------------------------------------------------------------------------------------------------------|---------------------------------------|------|----|------|
| Bifunctional anticaries peptides with antibacterial and remineralizing effects                                                                         | Oral Diseases                         | 2019 | 15 | 5.00 |
| Chitosan hydrogel containing amelogenin-derived peptide: Inhibition of cariogenic bacteria and promotion of remineralization of initial caries lesions | Archives of Oral Biology              | 2019 | 15 | 5.00 |
| A Novel Target-Specific, Salt-Resistant Antimicrobial Peptide against the Cariogenic Pathogen Streptococcus mutans                                     | Antimicrobial Agents and Chemotherapy | 2011 | 54 | 4.91 |
| Potential of an amelogenin based peptide in promoting remineralization of initial enamel caries                                                        | Archives of Oral Biology              | 2015 | 34 | 4.86 |
| Activity of Synthetic Antimicrobial Peptide GH12 against Oral Streptococci                                                                             | Caries Research                       | 2016 | 29 | 4.83 |
| Treatment of Oral Biofilms by a D-Enantiomeric Peptide                                                                                                 | Plos One                              | 2016 | 29 | 4.83 |
| Antimicrobial and DNA-binding activities of the peptide fragments of human lactoferrin and histatin 5 against Streptococcus mutans                     | Archives of Oral Biology              | 2011 | 52 | 4.73 |
| Antibacterial and Antibiofilm Activities of a Novel Synthetic Cyclic Lipopeptide against Cariogenic Streptococcus mutans UA159                         | Antimicrobial Agents and Chemotherapy | 2017 | 23 | 4.60 |
| A universal adhesive incorporating antimicrobial peptide nisin: effects on Streptococcus mutans and saliva-derived multispecies biofilms               | Odontology                            | 2020 | 9  | 4.50 |
| Oral antimicrobial peptides and biological control of caries                                                                                           | BMC Oral Health                       | 2006 | 71 | 4.44 |
| Antibiofilm peptides against oral biofilms                                                                                                             | Journal of Oral Microbiology          | 2017 | 22 | 4.40 |
| Salivary concentration of the antimicrobial peptide LL-37 in children                                                                                  | Archives of Oral Biology              | 2012 | 43 | 4.30 |
| Design and Characterization of an Acid-Activated Antimicrobial Peptide                                                                                 | Chemical Biology & Drug Design        | 2010 | 51 | 4.25 |

|                                                                                                                                                                              |                                                     |      |    |      |
|------------------------------------------------------------------------------------------------------------------------------------------------------------------------------|-----------------------------------------------------|------|----|------|
| Effects of Antimicrobial Peptide GH12 on the Cariogenic Properties and Composition of a Cariogenic Multispecies Biofilm                                                      | Applied and Environmental Microbiology              | 2018 | 17 | 4.25 |
| A synthetic peptide adhesion epitope as a novel antimicrobial agent                                                                                                          | Current Pharmaceutical Design                       | 1999 | 96 | 4.17 |
| Antimicrobial peptides in saliva of children with severe early childhood caries                                                                                              | Archives of Oral Biology                            | 2016 | 25 | 4.17 |
| Activity of human beta-defensin 3 alone or combined with other antimicrobial agents against oral bacteria                                                                    | Antimicrobial Agents and Chemotherapy               | 2003 | 78 | 4.11 |
| Clinical Efficacy of a Specifically Targeted Antimicrobial Peptide Mouth Rinse: Targeted Elimination of Streptococcus mutans and Prevention of Demineralization              | Caries Research                                     | 2011 | 44 | 4.00 |
| A novel hydroxyapatite-binding antimicrobial peptide against oral biofilms                                                                                                   | Clinical Oral Investigations                        | 2019 | 12 | 4.00 |
| Targeting the oral plaque microbiome with immobilized anti-biofilm peptides at tooth-restoration interfaces                                                                  | Plos One                                            | 2020 | 8  | 4.00 |
| Beta-defensin 1 gene polymorphisms in the pathologies of the oral cavity-Data from meta-analysis: Association only with rs1047031 not with rs1800972, rs1799946, and rs11362 | Journal of Oral Pathology & Medicine                | 2021 | 4  | 4.00 |
| The multifaceted roles of antimicrobial peptides in oral diseases                                                                                                            | Molecular Oral Microbiology                         | 2021 | 4  | 4.00 |
| TVH-19, a synthetic peptide, induces mineralization of dental pulp cells in vitro and formation of tertiary dentin in vivo                                                   | Biochemical and Biophysical Research Communications | 2021 | 4  | 4.00 |
| Effects of a derivative of reuterin 6 and gasserin A on the biofilm of Streptococcus mutans in vitro and caries prevention in vivo                                           | Odontology                                          | 2021 | 4  | 4.00 |

|                                                                                                                                       |                                               |      |    |      |
|---------------------------------------------------------------------------------------------------------------------------------------|-----------------------------------------------|------|----|------|
| The pH-Responsive Property of Antimicrobial Peptide GH12 Enhances Its Anticaries Effects at Acidic pH                                 | Caries Research                               | 2021 | 4  | 4.00 |
| Antimicrobial and antibiofilm activity of pleurocidin against cariogenic microorganisms                                               | Peptides                                      | 2011 | 43 | 3.91 |
| Divalent metal cations increase the activity of the antimicrobial peptide kappacin                                                    | Antimicrobial Agents and Chemotherapy         | 2005 | 66 | 3.88 |
| Systematic Approach to Optimizing Specifically Targeted Antimicrobial Peptides against Streptococcus mutans                           | Antimicrobial Agents and Chemotherapy         | 2010 | 46 | 3.83 |
| Effect of the antimicrobial decapeptide KSL on the growth of oral pathogens and Streptococcus mutans biofilm                          | International Journal of Antimicrobial Agents | 2011 | 42 | 3.82 |
| Targeted antimicrobial treatment to re-establish a healthy microbial flora for long-term protection                                   | Advances in dental research                   | 2012 | 38 | 3.80 |
| A novel antimicrobial peptide against dental-caries-associated bacteria                                                               | Anaerobe                                      | 2017 | 19 | 3.80 |
| Enhancement of salivary human neutrophil peptide 1-3 levels by probiotic supplementation                                              | Bmc Oral Health                               | 2015 | 26 | 3.71 |
| The role of salivary peptides in dental caries                                                                                        | Biomedical Chromatography                     | 2005 | 63 | 3.71 |
| Design of a hydroxyapatite-binding antimicrobial peptide with improved retention and antibacterial efficacy for oral pathogen control | Scientific Reports                            | 2016 | 22 | 3.67 |
| Anti-biofilm and anti-adherence properties of novel cyclic dipeptides against oral pathogens                                          | Bioorganic and Medicinal Chemistry            | 2019 | 11 | 3.67 |
| Antimicrobial activity of the synthetic peptide Lys-a1 against oral streptococci                                                      | Peptides                                      | 2013 | 32 | 3.56 |
| Design and activity of a 'dual-targeted' antimicrobial peptide                                                                        | International Journal of Antimicrobial Agents | 2009 | 46 | 3.54 |
| Cytotoxicity and the effect of cationic peptide fragments against cariogenic bacteria under planktonic and biofilm conditions         | Biofouling                                    | 2016 | 21 | 3.50 |

|                                                                                                                                                                       |                                        |      |    |      |
|-----------------------------------------------------------------------------------------------------------------------------------------------------------------------|----------------------------------------|------|----|------|
| Temporin-Like Peptides Show Antimicrobial and Anti-Biofilm Activities against Streptococcus mutans with Reduced Hemolysis                                             | Molecules                              | 2020 | 7  | 3.50 |
| Antimicrobial Peptide GH12 Prevents Dental Caries by Regulating Dental Plaque Microbiota                                                                              | Applied and Environmental Microbiology | 2020 | 7  | 3.50 |
| Antibacterial Efficacy of a Human beta-Defensin-3 Peptide on Multispecies Biofilms                                                                                    | Journal of Endodontics                 | 2013 | 31 | 3.44 |
| A study on beta-defensin-2 and histatin-5 as a diagnostic marker of early childhood caries progression                                                                | Biological Research                    | 2015 | 24 | 3.43 |
| The synthetic human beta-defensin-3 C15 peptide exhibits antimicrobial activity against Streptococcus mutans, both alone and in combination with dental disinfectants | Journal of Microbiology                | 2017 | 17 | 3.40 |
| Novel synthetic antimicrobial peptides against Streptococcus mutans                                                                                                   | Antimicrobial Agents and Chemotherapy  | 2007 | 49 | 3.27 |
| A statherin-derived peptide promotes hydroxyapatite crystallization and in situ remineralization of artificial enamel caries                                          | Rsc Advances                           | 2018 | 13 | 3.25 |
| Salivary protein polymorphisms and risk of dental caries: a systematic review                                                                                         | Brazilian Oral Research                | 2017 | 16 | 3.20 |
| Antimicrobial Activity and Mechanism of Action of a Novel Cationic alpha-Helical Octadecapeptide Derived From alpha-Amylase of Rice                                   | Biopolymers                            | 2015 | 22 | 3.14 |
| Streptococcus mutans strains recovered from caries-active or caries-free individuals differ in sensitivity to host antimicrobial peptides                             | Molecular Oral Microbiology            | 2011 | 34 | 3.09 |
| Targeted Antimicrobial Therapy Against Streptococcus mutans Establishes Protective Non-cariogenic Oral Biofilms and Reduces Subsequent Infection                      | International Journal of Oral Science  | 2010 | 37 | 3.08 |

|                                                                                                                                                                                  |                                          |      |    |      |
|----------------------------------------------------------------------------------------------------------------------------------------------------------------------------------|------------------------------------------|------|----|------|
| Bioinspired Peptide-Decorated Tannic Acid for in Situ Remineralization of Tooth Enamel: In Vitro and in Vivo Evaluation                                                          | Acs Biomaterials Science & Engineering   | 2017 | 15 | 3.00 |
| Combined analysis of the salivary microbiome and host defence peptides predicts dental disease                                                                                   | Scientific Reports                       | 2018 | 12 | 3.00 |
| Antimicrobial Effect of a Peptide Containing Novel Oral Spray on Streptococcus mutans                                                                                            | Biomed Research International            | 2020 | 6  | 3.00 |
| A single system detects and protects the beneficial oral bacterium Streptococcus sp. A12 from a spectrum of antimicrobial peptides                                               | Molecular Microbiology                   | 2021 | 3  | 3.00 |
| Novel lactotransferrin-derived synthetic peptides suppress cariogenic bacteria in vitro and arrest dental caries in vivo                                                         | Journal of Oral Microbiology             | 2021 | 3  | 3.00 |
| The consumption of milk supplemented with probiotics decreases the occurrence of caries and the salivary concentration of h beta D-3 in children                                 | Clinical Oral Investigations             | 2021 | 3  | 3.00 |
| Significant elevation of salivary human neutrophil peptides 1-3 levels by probiotic milk in preschool children with severe early childhood caries: a randomized controlled trial | Clinical Oral Investigations             | 2021 | 3  | 3.00 |
| Antibacterial Peptides: Opportunities for the Prevention and Treatment of Dental Caries                                                                                          | Probiotics and Antimicrobial Proteins    | 2011 | 32 | 2.91 |
| Evaluation of antibacterial, antibiofilm and antioxidant activities of synthesized silver nanoparticles (AgNPs) and casein peptide fragments against Streptococcus mutans        | European Journal of Integrative Medicine | 2017 | 14 | 2.80 |
| Peptide pheromone induced cell death of Streptococcus mutans                                                                                                                     | Fems Microbiology Letters                | 2005 | 47 | 2.76 |
| The assessment of sIgA, histatin-5, and lactoperoxidase levels in saliva of adolescents with dental caries                                                                       | Medical Science Monitor                  | 2014 | 22 | 2.75 |



|                                                                                                                                                     |                                                     |      |    |      |
|-----------------------------------------------------------------------------------------------------------------------------------------------------|-----------------------------------------------------|------|----|------|
| Peptide and non-peptide mimetics as potential therapeutics targeting oral bacteria and oral biofilms                                                | Molecular Oral Microbiology                         | 2019 | 8  | 2.67 |
| Correlation between human neutrophil peptide 1-3 secretion and azurophilic granule (CD63) expression in early childhood caries                      | Dental Research Journal                             | 2019 | 8  | 2.67 |
| Development of a peptide-containing chewing gum as a sustained release antiplaque antimicrobial delivery system                                     | Aaps Pharmscitech                                   | 2007 | 39 | 2.60 |
| An in vitro synergetic evaluation of the use of nisin and sodium fluoride or chlorhexidine against Streptococcus mutans                             | Peptides                                            | 2011 | 28 | 2.55 |
| Statherin and histatin 1 reduce parotid saliva-promoted Streptococcus mutans strain MT8148 adhesion to hydroxyapatite surfaces                      | Caries Research                                     | 2006 | 40 | 2.50 |
| Salivary antimicrobial proteins associate with age-related changes in streptococcal composition in dental plaque                                    | Molecular Oral Microbiology                         | 2014 | 20 | 2.50 |
| The investigation of synergistic activity of protamine with conventional antimicrobial agents against oral bacteria                                 | Biochemical and Biophysical Research Communications | 2020 | 5  | 2.50 |
| Salivary peptide profile and its association with early childhood caries                                                                            | International Journal of Paediatric Dentistry       | 2013 | 21 | 2.33 |
| Effect of histatin-5 and lysozyme on the ability of Streptococcus mutans to form biofilms in vitro conditions                                       | Postepy Higieny I Medycyny Doswiadczałnej           | 2015 | 16 | 2.29 |
| Selective activities of STAMPs against Streptococcus mutans                                                                                         | Experimental and Therapeutic Medicine               | 2018 | 9  | 2.25 |
| Sensitivity of caries pathogens to antimicrobial peptides related to caries risk                                                                    | Clinical Oral Investigations                        | 2018 | 9  | 2.25 |
| Antibacterial activity of a novel antimicrobial peptide [W7]KR12-KAEK derived from KR-12 against Streptococcus mutans planktonic cells and biofilms | Biofouling                                          | 2017 | 11 | 2.20 |

|                                                                                                                                                           |                                 |      |    |      |
|-----------------------------------------------------------------------------------------------------------------------------------------------------------|---------------------------------|------|----|------|
| Genetic Polymorphisms in DEFB1 and miRNA202 Are Involved in Salivary Human beta-Defensin 1 Levels and Caries Experience in Children                       | Caries Research                 | 2017 | 11 | 2.20 |
| Genetic variation in the promoter region of beta-defensin 1 (DEFB 1) is associated with high caries experience in children born with cleft lip and palate | Acta Odontologica Scandinavica  | 2014 | 17 | 2.13 |
| Oral streptococci exhibit diverse susceptibility to human beta-defensin 2: Antimicrobial effects of hBD-2 on oral streptococci                            | Current Microbiology            | 2004 | 38 | 2.11 |
| Endotoxin-neutralizing activity and mechanism of action of a cationic alpha-helical antimicrobial octadecapeptide derived from alpha-amylase of rice      | Peptides                        | 2016 | 12 | 2.00 |
| Caries and Innate Immunity: DEFB1 Gene Polymorphisms and Caries Susceptibility in Genetic Isolates from North-Eastern Italy                               | Caries Research                 | 2016 | 12 | 2.00 |
| Duplicated or Hybridized Peptide Functional Domains Promote Oral Homeostasis                                                                              | Journal of Dental Research      | 2017 | 10 | 2.00 |
| A novel non-cytotoxic synthetic peptide, Pug-1, exhibited an antibiofilm effect on Streptococcus mutans adhesion                                          | Letters in Applied Microbiology | 2020 | 4  | 2.00 |
| A novel dual-action antimicrobial peptide for caries management                                                                                           | Journal of Dentistry            | 2021 | 2  | 2.00 |
| Suppressive effects of gecko cathelicidin on biofilm formation and cariogenic virulence factors of Streptococcus mutans                                   | Archives of Oral Biology        | 2021 | 2  | 2.00 |
| Downregulation of Salivary Proteins, Protective against Dental Caries, in Type 1 Diabetes                                                                 | Proteomes                       | 2021 | 2  | 2.00 |
| Susceptibility of periodontopathogenic and cariogenic bacteria to Defensins and potential therapeutic use of Defensins in oral diseases                   | Current Pharmaceutical Design   | 2007 | 29 | 1.93 |
| In vitro antimicrobial effect of bacteriocin PsVP-10 in combination with chlorhexidine and triclosan against                                              | Archives of Oral Biology        | 2009 | 23 | 1.77 |

Streptococcus mutans and Streptococcus sobrinus strains

|                                                                                                                                                    |                                                            |      |    |      |
|----------------------------------------------------------------------------------------------------------------------------------------------------|------------------------------------------------------------|------|----|------|
| A synthetic peptide based on a natural salivary protein reduces demineralisation in model systems for dental caries and erosion                    | International Journal of Peptide Research and Therapeutics | 2007 | 25 | 1.67 |
| Rational design of peptides with enhanced antimicrobial and anti-biofilm activities against cariogenic bacterium Streptococcus mutans              | Chemical Biology & Drug Design                             | 2019 | 5  | 1.67 |
| Streptococcal adhesin SspA/B analogue peptide inhibits adherence and impacts biofilm formation of Streptococcus mutans                             | Plos One                                                   | 2017 | 8  | 1.60 |
| Effect of the Antimicrobial Peptide D-Nal-Pac-525 on the Growth of Streptococcus mutans and Its Biofilm Formation                                  | Journal of Microbiology and Biotechnology                  | 2013 | 14 | 1.56 |
| Association between genetic polymorphisms in DEFB1 and microRNA202 with caries in two groups of Brazilian children                                 | Archives of Oral Biology                                   | 2018 | 6  | 1.50 |
| Salivary proteins and peptides in the aetiology of caries in children: Systematic literature review                                                | Oral Diseases                                              | 2019 | 4  | 1.33 |
| A Membrane-Targeted Peptide Inhibiting PtxA of Phosphotransferase System Blocks Streptococcus mutans                                               | Caries Research                                            | 2019 | 4  | 1.33 |
| Inhibition of Streptococcus mutans adherence and biofilm formation using analogues of the SspB peptide                                             | Archives of Oral Biology                                   | 2010 | 15 | 1.25 |
| Host-derived pentapeptide affecting adhesion, proliferation, and local pH in biofilm communities composed of Streptococcus and Actinomyces species | Infection and Immunity                                     | 2006 | 19 | 1.19 |
| Remineralization of initial enamel caries in vitro using a novel peptide based on amelogenin                                                       | Frontiers of Materials Science                             | 2015 | 8  | 1.14 |
| Salivary mucin as related to oral Streptococcus mutans in elderly people                                                                           | Oral Microbiol Immunol                                     | 2000 | 24 | 1.09 |

|                                                                                                                              |                                                         |      |    |      |
|------------------------------------------------------------------------------------------------------------------------------|---------------------------------------------------------|------|----|------|
| Design of a peptibody consisting of the antimicrobial peptide dhvar5 and a llama variable heavy-chain antibody fragment      | Chemical Biology & Drug Design                          | 2006 | 17 | 1.06 |
| The impact of salivary lactoperoxidase and histatin-5 on early childhood caries severity in relation to nutritional status   | Saudi Dental Journal                                    | 2020 | 2  | 1.00 |
| Dual-sensitive antibacterial peptide nanoparticles prevent dental caries                                                     | Theranostics                                            | 2022 | 1  | 1.00 |
| Remineralising dentine caries using an artificial antimicrobial peptide: An in vitro study                                   | Journal of Dentistry                                    | 2021 | 1  | 1.00 |
| Bioinspired caries preventive strategy via customizable pellicles of saliva-derived protein/peptide constructs               | Scientific Reports                                      | 2021 | 1  | 1.00 |
| Influence of Gallic Acid and Thai Culinary Essential Oils on Antibacterial Activity of Nisin against Streptococcus mutans    | Advances in Pharmacological and Pharmaceutical Sciences | 2021 | 1  | 1.00 |
| Study of the ultrastructure of Enterococcus faecalis and Streptococcus mutans incubated with salivary antimicrobial peptides | Clinical and Experimental Dental Research               | 2021 | 1  | 1.00 |
| The Association of Early Childhood Caries with Salivary Antimicrobial Peptide LL37 and Mutans Streptococci                   | Journal of Clinical Pediatric Dentistry                 | 2021 | 1  | 1.00 |
| The Relation of Salivary Cathelicidin and Beta-Defensin with Dental Caries of Schoolchildren                                 | Journal of Research in Medical and Dental Science       | 2021 | 1  | 1.00 |
| Factors affecting antimicrobial activity of MUC7 12-mer, a human salivary mucin-derived peptide                              | Annals of Clinical Microbiology and Antimicrobials      | 2007 | 14 | 0.93 |
| Synergistic inhibitory effect of cationic peptides and antimicrobial agents on the growth of oral streptococci               | Caries Research                                         | 2003 | 17 | 0.89 |
| The level of beta defensin-2 in saliva and its expression in parotid gland epithelial cells after                            | European Journal of Dentistry                           | 2016 | 5  | 0.83 |

|                                                                                                                                                |                                                                                   |      |    |      |
|------------------------------------------------------------------------------------------------------------------------------------------------|-----------------------------------------------------------------------------------|------|----|------|
| probiotic (Lactobacillus reuteri) induction to inhibit Streptococcus mutans in caries                                                          |                                                                                   |      |    |      |
| New Preventive Approaches Part I: Functional Peptides and Other Therapies to Prevent Tooth Demineralization                                    | Monographs in Oral Science                                                        | 2017 | 3  | 0.60 |
| In vitro antibacterial activity of the peptide PsVP-10 against Streptococcus mutans and Streptococcus sobrinus with and without glycocalyx     | International Journal of Antimicrobial Agents                                     | 2006 | 9  | 0.56 |
| Association between rs11362 polymorphism in the beta-defensin 1 (DEFB1) gene and dental caries: A meta-analysis                                | Journal of Oral Biosciences                                                       | 2020 | 1  | 0.50 |
| Can Salivary Biomarkers Be Used as Predictors of Dental Caries in Young Adolescents?                                                           | Medical Science Monitor                                                           | 2020 | 1  | 0.50 |
| Salivary lysozyme, lactoferrin and peroxidases: antibacterial effects on cariogenic bacteria and clinical applications in preventive dentistry | Proceedings of the Finnish Dental Society. Suomen Hammaslaakariseuran toimituksia | 1991 | 14 | 0.45 |
| Peptide inhibitors of Streptococcus mutans in the control of dental caries                                                                     | International Journal of Peptide Research and Therapeutics                        | 2007 | 4  | 0.27 |
| Effects of cecropin-XJ on growth and adherence of oral cariogenic bacteria in vitro                                                            | Chinese Medical Journal                                                           | 2005 | 3  | 0.18 |
| Peptide-Enabled Nanocomposites Offer Biomimetic Reconstruction of Silver Diamine Fluoride-Treated Dental Tissues                               | Polymers (Basel)                                                                  | 2022 | 0  | 0.00 |
| Efficacy of the dual-action GA-KR12 peptide for remineralising initial enamel caries: an in vitro study                                        | Clinical Oral Investigations                                                      | 2022 | 0  | 0.00 |
| Engineered Salivary Peptides Reduce Enamel Demineralization Provoked by Cariogenic S. mutans Biofilm                                           | Microorganisms                                                                    | 2022 | 0  | 0.00 |
| Constructing an anti-S. mutans and mineralizing membrane by combination self-assembled lysozyme with antimicrobial peptide                     | Materials and Design                                                              | 2022 | 0  | 0.00 |

|                                                                                                                                                                                 |                                                            |      |   |      |
|---------------------------------------------------------------------------------------------------------------------------------------------------------------------------------|------------------------------------------------------------|------|---|------|
| The Application of a Recombinant Antimicrobial Peptide Thrombocidin-1 Expressed in Pichia pastoris as a Novel Approach Against Some Oral Pathogenic Bacteria: An In Vitro Study | Protein and Peptide Letters                                | 2022 | 0 | 0.00 |
| Selective antibacterial activity of a novel lactotransferrin-derived antimicrobial peptide LF-1 against Streptococcus mutans                                                    | Archives of Oral Biology                                   | 2022 | 0 | 0.00 |
| Quantitative analysis of Protective Role of salivary protein on demineralization of enamel                                                                                      | Pakistan Journal of Medical & Health Sciences              | 2021 | 0 | 0.00 |
| Evaluation of possible biomarkers for caries risk in children 6 to 12 years of age                                                                                              | Journal of Oral Microbiology                               | 2021 | 0 | 0.00 |
| Spectrophotometric Analysis of Streptococcus mutans Growth and Biofilm Formation in Saliva and Histatin-5 Relate to pH and Viscosity                                            | Pesquisa Brasileira Em Odontopediatria E Clinica Integrada | 2021 | 0 | 0.00 |
| A New Approach Against Some Oral Pathogenic Bacteria Using a Chimeric Antimicrobial Peptide Derived from the Camel Milk; Lactoferrampin Lactoferricin Chimer                    | Current Drug Discovery Technologies                        | 2021 | 0 | 0.00 |
| Associations of early childhood caries with salivary beta defensin-3 and childhood anemia: a case-control study                                                                 | Bmc Oral Health                                            | 2021 | 0 | 0.00 |
| Association of $\beta$ -defensin 1 gene polymorphism and dental caries susceptibility in tamil ethnicity                                                                        | Research Journal of Pharmacy and Technology                | 2021 | 0 | 0.00 |
| Salivary peptide human neutrophil defensin1-3 and its relationship with early childhood caries                                                                                  | Dental Research Journal                                    | 2020 | 0 | 0.00 |
